# Supplementary material for: Ziziphus joazeiro Stem Bark Extract as a Green Corrosion Inhibitor for Mild Steel in Acid Medium
Source: MDPI journal article supplement (doi:10.3390/pr9081323), 2021-07-29
Supplement: s1 [file s1]

**Table S2.** Quantum Chemical local parameters for saponin by B3LYP/LanL2DZ level with PCM model.

| 1 <sub>prot</sub> | Mulliken | $f_k^-$ | $f_k^+$ | %HOMO | %LUMO  |
|-------------------|----------|---------|---------|-------|--------|
| C10               | -0.486   | 0.000   | 0.003   | 0.770 | 1.278  |
| C13               | -0.545   | -0.003  | 0.000   | 2.123 | 0.341  |
| C16               | -0.265   | -0.005  | 0.000   | 2.863 | 0.345  |
| C18               | 0.407    | 0.004   | 0.000   | 4.016 | 0.324  |
| C19               | -0.047   | 0.003   | 0.000   | 2.390 | 0.144  |
| C21               | -0.606   | 0.000   | 0.000   | 1.087 | 0.182  |
| C24               | -0.157   | -0.001  | 0.000   | 1.454 | 0.380  |
| C26               | 0.399    | 0.005   | 0.000   | 2.067 | 0.718  |
| C45               | -0.594   | 0.001   | 0.000   | 1.246 | 0.084  |
| C48               | -0.087   | 0.001   | 0.000   | 1.850 | 0.034  |
| C50               | -0.785   | 0.000   | 0.000   | 1.469 | 0.124  |
| C53               | -0.183   | -0.002  | 0.000   | 1.948 | 0.100  |
| C54               | 0.343    | -0.001  | 0.000   | 2.286 | 0.068  |
| C55               | -0.530   | 0.013   | 0.000   | 4.294 | 0.041  |
| C58               | 0.019    | -0.020  | 0.000   | 2.458 | 0.034  |
| O60               | -0.391   | 0.073   | 0.000   | 5.234 | 0.025  |
| C61               | -0.742   | 0.003   | 0.000   | 1.829 | 0.028  |
| O65               | -0.563   | 0.023   | 0.000   | 1.863 | 0.011  |
| C67               | -0.408   | 0.158   | 0.000   | 9.565 | 0.036  |
| C69               | 0.366    | 0.130   | 0.000   | 8.424 | 0.025  |
| C70               | -0.753   | -0.011  | 0.000   | 2.002 | 0.008  |
| C74               | -0.749   | -0.012  | 0.000   | 2.014 | 0.003  |
| O132              | -0.422   | 0.000   | 0.073   | 0.148 | 12.666 |
| S133              | 1.270    | 0.001   | 0.158   | 0.270 | 16.314 |
| O134              | -0.527   | -0.002  | 0.117   | 0.248 | 12.155 |
| O135              | -0.502   | 0.001   | 0.119   | 0.070 | 10.223 |
| O136              | -0.641   | 0.001   | 0.078   | 0.124 | 13.348 |
| O144              | -0.371   | 0.153   | 0.001   | 7.036 | 0.495  |
