# Supplementary material for: Ziziphus joazeiro Stem Bark Extract as a Green Corrosion Inhibitor for Mild Steel in Acid Medium
Source: MDPI journal article supplement (doi:10.3390/pr9081323), 2021-07-29
Supplement: s1 [file s1]

**Table S1:** Compound annotation of main the saponins from EJSB from the positive-ESI.

| Cluster ID | Retention time (RT) | Precursor mass | Error (ppm) | Tentative Annotation                                                 | Key fragments                                                |
|------------|---------------------|----------------|-------------|----------------------------------------------------------------------|--------------------------------------------------------------|
| MN500      | 9.37                | 473.3602       | 4.94        | Jujubogenin/pseudojujubogenin                                        | 417.2974;<br>373.2715;<br>455.3494;<br>109.1009<br>419.3283; |
| MN543      | 9.52                | 437.3392       | 5.05        | Deoxyjujubogenin                                                     | 295.2396;<br>177.1264;<br>107.0852<br>437.3387;              |
| MN515      | 10.10               | 455.3497       | 4.99        | Deoxypseudojujubogenin                                               | 369.2767;<br>247.1678;<br>123.1163<br>437.3390;              |
| 487        | 9.53                | 455.3496       | 5.2         | Deoxypseudojujubogenin                                               | 419.3294;<br>313.2507;<br>125.0955<br>469.3650;              |
| 496        | 11.76               | 487.3756       | 5.31        | Methylpseudojujubogenin                                              | 451.3541;<br>121.1007;<br>135.1162<br>469.3650;              |
| 479        | 11.41               | 487.3757       | 5.31        | Methylpseudojujubogenin                                              | 451.3546;<br>135.1162;<br>121.1007<br>473.3598;              |
| 497        | 9.37                | 491.3704       | 5.49        | Jujubogenin/pseudojujubogenin derivative (Hydroxy)                   | 417.2974;<br>373.2715;<br>455.3493<br>605.4016;              |
| 489        | 9.84                | 623.4121       |             | not identified                                                       | 549.3387;<br>505.3131;<br>587.3908<br>455.3495;              |
| 532        | 10.56               | 899.4964       | 3.87        | Deoxypseudojujubogenin glycoside (hexose + pentose + pentose)        | 265.0906;<br>437.3399;<br>391.2827<br>455.3495;              |
| 545        | 10.92               | 847.4104       |             | Deoxypseudojujubogenin glycoside derivative (hexose + pentose + 98)  | 437.3384;<br>749.4447;<br>587.3913<br>455.3495;              |
| 584        | 11.11               | 737.4430       | 5.49        | Deoxypseudojujubogenin glycoside derivative (pentose + pentose + 18) | 437.3385;<br>719.4324;<br>211.0590<br>587.3914;              |
| 523        | 11.60               | 605.4005       |             | not identified                                                       | 588.3942;<br>369.2766;                                       |

|     |      |          |      |                                                       |           |
|-----|------|----------|------|-------------------------------------------------------|-----------|
|     |      |          |      |                                                       | 437.3396  |
|     |      |          |      |                                                       | 473.3598; |
| 512 | 9.06 | 491.3704 | 5.49 | Jujubogenin/pseudojujubogenin<br>derivative (Hydroxy) | 417.2974; |
|     |      |          |      |                                                       | 373.2715; |
|     |      |          |      |                                                       | 455.3493  |
|     |      |          |      |                                                       | 417.2974; |
| 524 | 9.26 | 473.3602 | 4.94 | Jujubogenin/pseudojujubogenin                         | 373.2715; |
|     |      |          |      |                                                       | 455.3494; |
|     |      |          |      |                                                       | 109.1009  |

---
