# Supplementary material for: Ziziphus joazeiro Stem Bark Extract as a Green Corrosion Inhibitor for Mild Steel in Acid Medium
Source: MDPI journal article supplement (doi:10.3390/pr9081323), 2021-07-29
Supplement: s1 [file s1]

**Table S3:** Quantum Chemical local parameters for saponin by B3LYP/LanL2DZ level with PCM model.

| $l_{\text{prot}}$ | Mulliken | $f_k^-$ | $f_k^+$ | %HOMO | %LUMO |
|-------------------|----------|---------|---------|-------|-------|
| C1                | -0.504   | -0.001  | 0.000   | 0.681 | 0.851 |
| H2                | 0.195    | 0.003   | 0.002   | 0.125 | 0.118 |
| H3                | 0.211    | -0.003  | -0.002  | 0.191 | 0.259 |
| C4                | -0.445   | 0.000   | 0.000   | 0.559 | 0.489 |
| H5                | 0.183    | 0.002   | 0.001   | 0.115 | 0.029 |
| H6                | 0.220    | 0.001   | 0.001   | 0.085 | 0.117 |
| C7                | 0.007    | 0.000   | 0.003   | 0.275 | 1.018 |
| H8                | 0.218    | 0.000   | -0.006  | 0.082 | 0.298 |
| C9                | 0.407    | 0.000   | 0.000   | 0.380 | 0.460 |
| C10               | -0.486   | 0.000   | 0.003   | 0.770 | 1.278 |
| H11               | 0.216    | 0.005   | 0.002   | 0.091 | 0.037 |
| H12               | 0.212    | 0.001   | -0.006  | 0.149 | 0.262 |
| C13               | -0.545   | -0.003  | 0.000   | 2.123 | 0.341 |
| H14               | 0.199    | 0.005   | 0.001   | 0.148 | 0.052 |
| H15               | 0.197    | 0.006   | 0.001   | 0.185 | 0.031 |
| C16               | -0.265   | -0.005  | 0.000   | 2.863 | 0.345 |
| H17               | 0.218    | 0.031   | 0.000   | 1.969 | 0.005 |
| C18               | 0.407    | 0.004   | 0.000   | 4.016 | 0.324 |
| C19               | -0.047   | 0.003   | 0.000   | 2.390 | 0.144 |
| H20               | 0.195    | 0.016   | 0.000   | 0.806 | 0.042 |
| C21               | -0.606   | 0.000   | 0.000   | 1.087 | 0.182 |
| H22               | 0.226    | 0.010   | 0.000   | 0.441 | 0.033 |
| H23               | 0.214    | 0.006   | 0.000   | 0.126 | 0.011 |
| C24               | -0.157   | -0.001  | 0.000   | 1.454 | 0.380 |
| H25               | 0.157    | 0.004   | 0.001   | 0.124 | 0.084 |
| C26               | 0.399    | 0.005   | 0.000   | 2.067 | 0.718 |
| C27               | 0.455    | 0.001   | 0.000   | 1.075 | 0.520 |
| C28               | -0.211   | -0.001  | 0.000   | 0.543 | 0.851 |
| H29               | 0.189    | 0.002   | 0.002   | 0.195 | 0.159 |
| C30               | -0.777   | 0.000   | 0.000   | 0.090 | 0.327 |
| H31               | 0.205    | 0.001   | 0.001   | 0.006 | 0.062 |
| H32               | 0.209    | 0.001   | 0.000   | 0.029 | 0.024 |
| H33               | 0.216    | 0.000   | 0.000   | 0.050 | 0.169 |
| C34               | -0.735   | 0.000   | 0.000   | 0.228 | 0.240 |
| H35               | 0.206    | 0.001   | 0.000   | 0.026 | 0.011 |
| H36               | 0.196    | 0.001   | 0.001   | 0.013 | 0.031 |
| H37               | 0.210    | 0.000   | 0.000   | 0.013 | 0.024 |
| C38               | -0.814   | 0.000   | 0.000   | 0.879 | 0.181 |
| H39               | 0.211    | 0.002   | 0.001   | 0.136 | 0.022 |
| H40               | 0.213    | 0.002   | 0.001   | 0.019 | 0.028 |
| H41               | 0.208    | 0.003   | 0.000   | 0.037 | 0.008 |

|     |        |        |        |       |       |
|-----|--------|--------|--------|-------|-------|
| C42 | -0.417 | -0.003 | 0.000  | 2.474 | 1.289 |
| H43 | 0.227  | 0.027  | -0.002 | 1.607 | 0.344 |
| H44 | 0.203  | 0.030  | 0.001  | 1.858 | 0.030 |
| C45 | -0.594 | 0.001  | 0.000  | 1.246 | 0.084 |
| H46 | 0.225  | 0.014  | 0.000  | 0.601 | 0.005 |
| H47 | 0.213  | 0.005  | 0.000  | 0.191 | 0.014 |
| C48 | -0.087 | 0.001  | 0.000  | 1.850 | 0.034 |
| H49 | 0.223  | 0.013  | 0.000  | 0.094 | 0.001 |
| C50 | -0.785 | 0.000  | 0.000  | 1.469 | 0.124 |
| H51 | 0.216  | 0.006  | 0.000  | 0.258 | 0.006 |
| H52 | 0.214  | 0.007  | 0.000  | 0.485 | 0.007 |
| C53 | -0.183 | -0.002 | 0.000  | 1.948 | 0.100 |
| C54 | 0.343  | -0.001 | 0.000  | 2.286 | 0.068 |
| C55 | -0.530 | 0.013  | 0.000  | 4.294 | 0.041 |
| H56 | 0.232  | 0.016  | 0.000  | 0.206 | 0.003 |
| H57 | 0.211  | 0.019  | 0.000  | 0.262 | 0.005 |
| C58 | 0.019  | -0.020 | 0.000  | 2.458 | 0.034 |
| H59 | 0.198  | 0.026  | 0.000  | 0.972 | 0.010 |
| O60 | -0.391 | 0.073  | 0.000  | 5.234 | 0.025 |
| C61 | -0.742 | 0.003  | 0.000  | 1.829 | 0.028 |
| H62 | 0.206  | 0.006  | 0.000  | 0.087 | 0.001 |
| H63 | 0.225  | 0.009  | 0.000  | 0.484 | 0.005 |
| H64 | 0.211  | 0.007  | 0.000  | 0.027 | 0.003 |
| O65 | -0.563 | 0.023  | 0.000  | 1.863 | 0.011 |
| H66 | 0.376  | -0.003 | 0.000  | 0.205 | 0.000 |
| C67 | -0.408 | 0.158  | 0.000  | 9.565 | 0.036 |
| H68 | 0.243  | 0.021  | 0.000  | 0.256 | 0.003 |
| C69 | 0.366  | 0.130  | 0.000  | 8.424 | 0.025 |
| C70 | -0.753 | -0.011 | 0.000  | 2.002 | 0.008 |
| H71 | 0.217  | 0.031  | 0.000  | 0.666 | 0.000 |
| H72 | 0.216  | 0.031  | 0.000  | 0.651 | 0.000 |
| H73 | 0.223  | 0.012  | 0.000  | 0.003 | 0.000 |
| C74 | -0.749 | -0.012 | 0.000  | 2.014 | 0.003 |
| H75 | 0.213  | 0.030  | 0.000  | 1.592 | 0.001 |
| H76 | 0.212  | 0.031  | 0.000  | 1.633 | 0.001 |
| H77 | 0.224  | 0.014  | 0.000  | 0.046 | 0.001 |
| O78 | -0.439 | 0.001  | -0.001 | 0.130 | 0.304 |
| C79 | 0.098  | 0.000  | 0.000  | 0.172 | 0.485 |
| C80 | -0.072 | 0.000  | 0.000  | 0.189 | 0.535 |
| H81 | 0.200  | 0.000  | 0.001  | 0.048 | 0.067 |
| C82 | -0.009 | 0.000  | 0.000  | 0.053 | 0.477 |
| H83 | 0.259  | 0.000  | 0.001  | 0.003 | 0.036 |
| C84 | -0.303 | 0.000  | 0.000  | 0.036 | 0.228 |
| C85 | -0.137 | 0.000  | 0.000  | 0.077 | 0.170 |

|      |        |       |        |       |       |
|------|--------|-------|--------|-------|-------|
| H86  | 0.247  | 0.000 | 0.001  | 0.011 | 0.020 |
| H87  | 0.236  | 0.000 | 0.001  | 0.009 | 0.031 |
| H88  | 0.214  | 0.000 | 0.001  | 0.027 | 0.031 |
| H89  | 0.251  | 0.000 | 0.001  | 0.005 | 0.027 |
| O90  | -0.386 | 0.000 | 0.002  | 0.027 | 0.201 |
| C91  | 0.025  | 0.000 | -0.001 | 0.014 | 0.095 |
| C92  | -0.057 | 0.000 | 0.001  | 0.007 | 0.094 |
| C93  | -0.500 | 0.000 | 0.001  | 0.003 | 0.063 |
| H94  | 0.217  | 0.000 | 0.002  | 0.003 | 0.027 |
| C95  | -0.451 | 0.000 | -0.002 | 0.010 | 0.037 |
| H96  | 0.242  | 0.000 | 0.002  | 0.001 | 0.009 |
| C97  | 0.014  | 0.000 | -0.002 | 0.006 | 0.061 |
| H98  | 0.220  | 0.000 | 0.002  | 0.000 | 0.014 |
| H99  | 0.217  | 0.000 | 0.004  | 0.001 | 0.008 |
| C100 | -0.007 | 0.000 | 0.006  | 0.004 | 0.053 |
| H101 | 0.230  | 0.000 | 0.004  | 0.002 | 0.003 |
| H102 | 0.219  | 0.000 | 0.004  | 0.001 | 0.003 |
| H103 | 0.225  | 0.000 | 0.004  | 0.001 | 0.001 |
| H104 | 0.263  | 0.000 | 0.008  | 0.001 | 0.010 |
| O105 | -0.311 | 0.000 | 0.001  | 0.113 | 0.140 |
| O106 | -0.513 | 0.000 | 0.001  | 0.044 | 0.063 |
| H107 | 0.373  | 0.000 | 0.000  | 0.002 | 0.014 |
| O108 | -0.357 | 0.000 | 0.001  | 0.029 | 0.750 |
| O109 | -0.531 | 0.000 | 0.002  | 0.004 | 0.085 |
| H110 | 0.373  | 0.000 | 0.002  | 0.000 | 0.014 |
| C111 | -0.401 | 0.000 | -0.002 | 0.004 | 0.019 |
| H112 | 0.195  | 0.000 | 0.002  | 0.000 | 0.001 |
| H113 | 0.217  | 0.000 | 0.004  | 0.001 | 0.002 |
| O114 | -0.538 | 0.000 | 0.005  | 0.003 | 0.011 |
| H115 | 0.393  | 0.000 | -0.003 | 0.000 | 0.001 |
| O116 | -0.472 | 0.000 | 0.037  | 0.001 | 0.024 |
| S117 | 1.262  | 0.000 | 0.074  | 0.002 | 0.024 |
| O118 | -0.524 | 0.000 | 0.057  | 0.001 | 0.017 |
| O119 | -0.551 | 0.000 | 0.053  | 0.001 | 0.020 |
| O120 | -0.532 | 0.000 | 0.042  | 0.001 | 0.019 |
| C121 | -0.068 | 0.000 | 0.000  | 0.041 | 0.767 |
| O122 | -0.322 | 0.000 | 0.010  | 0.026 | 0.890 |
| C123 | -0.127 | 0.000 | -0.002 | 0.042 | 2.676 |
| H124 | 0.325  | 0.000 | 0.005  | 0.007 | 0.264 |
| C125 | -0.003 | 0.000 | -0.005 | 0.025 | 1.356 |
| C126 | -0.076 | 0.000 | 0.003  | 0.064 | 3.021 |
| H127 | 0.263  | 0.000 | 0.012  | 0.005 | 0.599 |
| H128 | 0.255  | 0.000 | 0.008  | 0.009 | 0.236 |
| H129 | 0.282  | 0.000 | 0.015  | 0.008 | 1.283 |

|      |        |        |        |       |        |
|------|--------|--------|--------|-------|--------|
| O130 | -0.518 | 0.000  | 0.007  | 0.040 | 0.834  |
| H131 | 0.437  | 0.000  | 0.000  | 0.004 | 0.052  |
| O132 | -0.422 | 0.000  | 0.073  | 0.148 | 12.666 |
| S133 | 1.270  | 0.001  | 0.158  | 0.270 | 16.314 |
| O134 | -0.527 | -0.002 | 0.117  | 0.248 | 12.155 |
| O135 | -0.502 | 0.001  | 0.119  | 0.070 | 10.223 |
| O136 | -0.641 | 0.001  | 0.078  | 0.124 | 13.348 |
| C137 | -0.340 | 0.000  | 0.000  | 0.025 | 1.566  |
| H138 | 0.202  | 0.000  | 0.005  | 0.001 | 0.104  |
| H139 | 0.228  | 0.000  | 0.007  | 0.006 | 0.193  |
| O140 | -0.527 | 0.000  | 0.013  | 0.024 | 2.133  |
| H141 | 0.424  | 0.000  | -0.005 | 0.003 | 0.213  |
| H142 | 0.204  | 0.011  | 0.000  | 0.171 | 0.003  |
| H143 | 0.214  | 0.026  | 0.000  | 0.925 | 0.003  |
| O144 | -0.371 | 0.153  | 0.001  | 7.036 | 0.495  |
| H145 | 0.502  | 0.000  | 0.042  | 0.004 | 1.390  |
| H146 | 0.475  | 0.000  | 0.017  | 0.000 | 0.002  |

---
