# Supplementary figures and images for: Ziziphus joazeiro Stem Bark Extract as a Green Corrosion Inhibitor for Mild Steel in Acid Medium
Source: MDPI journal article supplement (doi:10.3390/pr9081323), 2021-07-29

#1 #2 #3 #4 #5 #6 #7 #8 #9 #10 #12 #13 #14

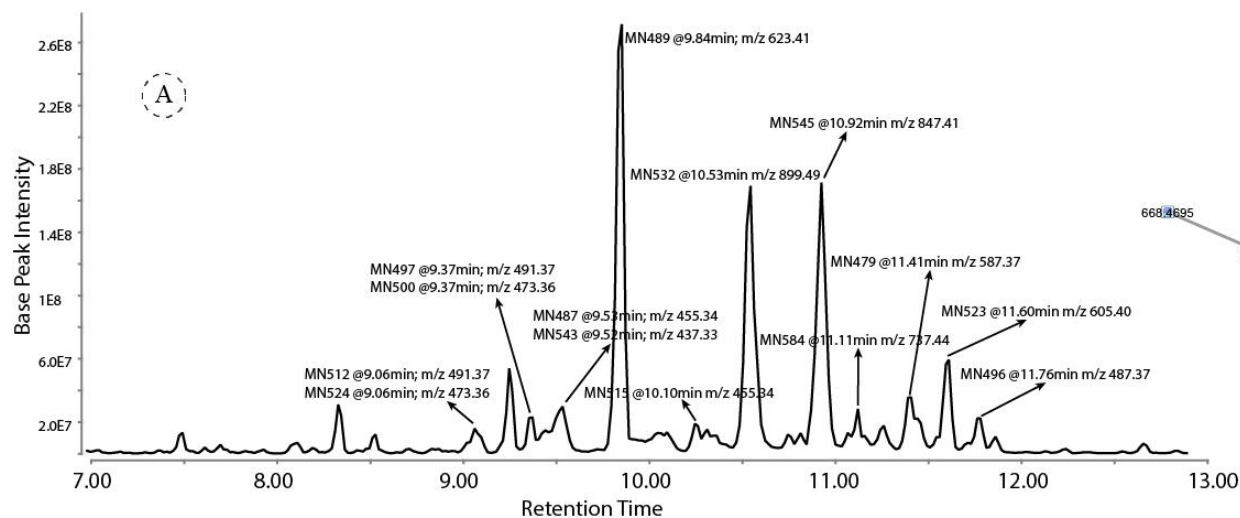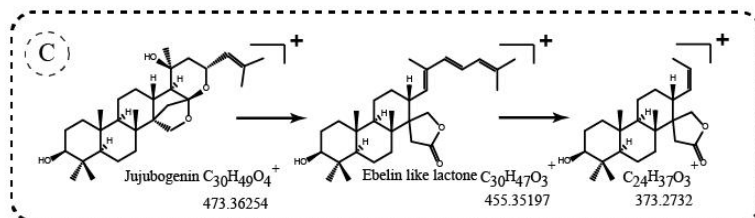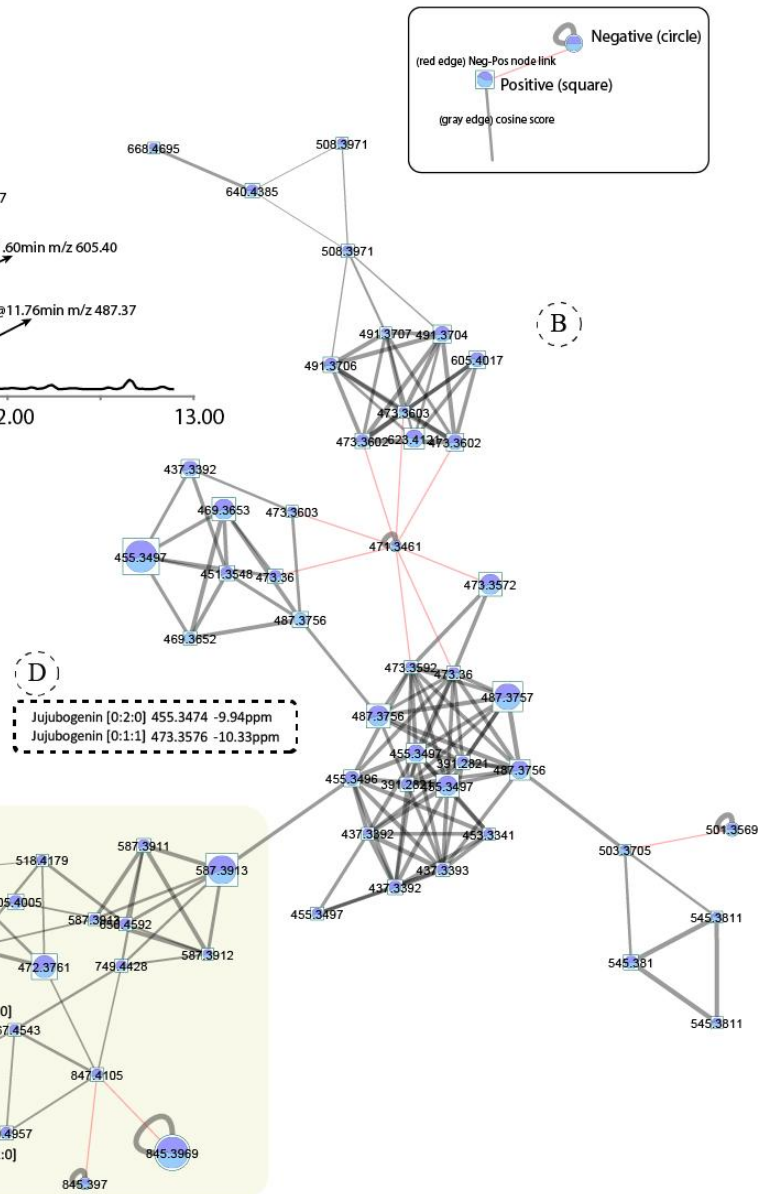

Supplement: s1 [file s1]
